# Supplementary material
Source: publisher site journal article supplement (http://www.spandidos-publications.com/6214/downloadSupplementary)
Supplement: Supplementary file 1 [file downloadSupplementary]

## Sheet: Sheet1
Table SV. Detailed information of the predicted potential ferroptosis-regulating drugs by DSigDB.
Term	P-value	Adjusted P-value	Odds ratio	Combined score	Gene
Retinoic acid CTD 00006918	0.00964454	0.0318939	47226	219193	GJA1, SLC40A1 and SNCA
benzo[a]pyrene CTD 00005488	0.0108174	0.0330149	46728	211519	GJA1, SLC40A1 and SNCA
Leupeptin CTD 00001574	0.00164914	0.0269619	999.35	6403.33	GJA1
2-Propenamide, 2-cyano-3-(3,4-dihydroxy-5-nitrophenyl)-N,N-diethyl- CTD 00002756	0.00164914	0.0269619	999.35	6403.33	SNCA
ALUMINUM CHLORIDE CTD 00000571	0.00164914	0.0269619	999.35	6403.33	SNCA
Coenzyme Q10 CTD 00001167	0.00179898	0.0269619	908.455	5741.92	SNCA
probucol CTD 00006616	0.00179898	0.0269619	908.455	5741.92	SNCA
Calpain inhibitor I CTD 00002578	0.00254792	0.0269619	624.406	3729.25	GJA1
selegiline CTD 00006730	0.00284739	0.0269619	554.972	3252.89	SNCA
Pyridaben CTD 00003936	0.0029971	0.0269619	525.737	3054.59	SNCA
CP-690334-01 MCF7 DOWN	0.0031468	0.0269619	499.425	2877.37	GJA1
probenecid BOSS	0.00329648	0.0269619	475.619	2718.11	GJA1
griseofulvin CTD 00006055	0.00329648	0.0269619	475.619	2718.11	GJA1
flufenamic acid BOSS	0.00344615	0.0269619	453.977	2574.28	GJA1
Linsidomine CTD 00000073	0.00344615	0.0269619	453.977	2574.28	SNCA
LY-294002 MCF7 DOWN	0.00359581	0.0269619	434.217	2443.77	GJA1
Crystal violet CTD 00006023	0.00374545	0.0269619	416.104	2324.86	SNCA
ALENDRONATE SODIUM BOSS	0.00374545	0.0269619	416.104	2324.86	GJA1
ganciclovir BOSS	0.00374545	0.0269619	416.104	2324.86	GJA1
Olmesartan BOSS	0.00389507	0.0269619	399.44	2216.11	GJA1
metoprolol BOSS	0.00389507	0.0269619	399.44	2216.11	GJA1
niclosamide MCF7 DOWN	0.00404468	0.0269619	384.058	2116.29	GJA1
MANEB CTD 00006239	0.00419427	0.0269619	369.815	2024.38	SNCA
Pararosaniline CTD 00000224	0.00434385	0.0269619	356.589	1939.49	SNCA
diazoxide BOSS	0.00434385	0.0269619	356.589	1939.49	GJA1
pyrogallol CTD 00006673	0.00449341	0.0269619	344.276	1860.86	SNCA
monocrotaline BOSS	0.00449341	0.0269619	344.276	1860.86	GJA1
Pyrogastrone BOSS	0.00449341	0.0269619	344.276	1860.86	GJA1
monorden PC3 UP	0.00449341	0.0269619	344.276	1860.86	GJA1
IRON CTD 00006166	0.00024022	0.0216708	222.685	1855.85	SLC40A1 and SNCA
IRON BOSS	0.000253747	0.0216708	216.546	1792.83	GJA1 and SLC40A1
ALUMINUM CTD 00005362	0.00464296	0.0269619	332.783	1787.85	SNCA
Poloxalene BOSS	0.0047925	0.0269619	322.032	1719.88	GJA1
27-hydroxycholesterol CTD 00002877	0.0047925	0.0269619	322.032	1719.88	SNCA
141-05-9 CTD 00000755	0.0047925	0.0269619	322.032	1719.88	SLC40A1
folic acid CTD 00005997	0.000279023	0.0216708	206.302	1688.42	GJA1 and SLC40A1
valsartan BOSS	0.00494202	0.0269619	311.953	1656.47	GJA1
ketoconazole	0.00494202	0.0269619	311.953	1656.47	SNCA
Triton X-100 BOSS	0.00494202	0.0269619	311.953	1656.47	GJA1
Inositol 1,4,5-triphosphate BOSS	0.00509152	0.0269619	302.485	1597.17	GJA1
heptachlor CTD 00006083	0.00509152	0.0269619	302.485	1597.17	GJA1
Tauroursodeoxycholic acid CTD 00001524	0.00524101	0.0271368	293.574	1541.63	SNCA
15-delta prostaglandin J2 MCF7 DOWN	0.00568939	0.028818	269.73	1394.27	GJA1
ethanol CTD 00005337	0.000395441	0.0230344	172.646	1352.77	SLC40A1 and SNCA
oxidopamine CTD 00007130	0.00583882	0.0289456	262.618	1350.71	SNCA
levamisole BOSS	0.00643638	0.0298864	237.56	1198.68	GJA1
.beta.-Adenosine BOSS	0.00658574	0.0298864	232.023	1165.42	GJA1
LITHIUM CHLORIDE BOSS	0.00673508	0.0298864	226.739	1133.79	GJA1
dieldrin CTD 00005808	0.00673508	0.0298864	226.739	1133.79	GJA1
phenoxybenzamine MCF7 DOWN	0.00703371	0.0298864	216.859	1074.98	GJA1
indometacin PC3 UP	0.00703371	0.0298864	216.859	1074.98	GJA1
Crystal violet	0.00718301	0.0298864	212.234	1047.6	SNCA
BUTHIONINE SULFOXIMINE CTD 00007280	0.00718301	0.0298864	212.234	1047.6	SNCA
Sildenafil citrate BOSS	0.00718301	0.0298864	212.234	1047.6	GJA1
lactacystin CTD 00002698	0.00733229	0.0299723	207.802	1021.44	SNCA
Ethidium BOSS	0.0076308	0.0306548	199.47	972.528	GJA1
17-Ethynyl estradiol CTD 00005932	0.000683902	0.0269619	130.43	950.538	GJA1 and SLC40A1
dl-Thioctic acid CTD 00006215	0.00807846	0.0318939	188.151	906.615	SNCA
Methoprene BOSS	0.00822765	0.0318939	184.657	886.403	GJA1
alpha-Tocopherol CTD 00007387	0.00867513	0.0318939	174.912	830.36	SNCA
coenzyme A BOSS	0.00882426	0.0318939	171.888	813.073	GJA1
Propranolol hydrochloride BOSS	0.00912248	0.0318939	166.142	780.37	GJA1
caffeic acid CTD 00001850	0.00927156	0.0318939	163.41	764.889	SNCA
dopamine CTD 00005870	0.00927156	0.0318939	163.41	764.889	SNCA
beta-carotene BOSS	0.00942063	0.0318939	160.766	749.95	GJA1
T0901317 CTD 00003912	0.00942063	0.0318939	160.766	749.95	SNCA
Orphenadrine hydrochloride BOSS	0.00956969	0.0318939	158.206	735.526	GJA1
Gallic acid CTD 00006020	0.00956969	0.0318939	158.206	735.526	SNCA
carvedilol CTD 00001961	0.00971873	0.0318939	155.727	721.59	GJA1
Mehp CTD 00000849	0.0101658	0.0324469	148.731	682.488	GJA1
5-azacytidine BOSS	0.0101658	0.0324469	148.731	682.488	GJA1
OXYTOCIN BOSS	0.0103147	0.0324775	146.537	670.286	GJA1
brefeldin A BOSS	0.0104637	0.0325073	144.406	658.468	GJA1
rosiglitazone PC3 UP	0.0109105	0.0330149	138.368	625.151	GJA1
carbachol BOSS	0.0110594	0.0330365	136.466	614.706	GJA1
Panobinostat CTD 00004412	0.0113572	0.0332167	132.813	594.725	SLC40A1
rotenone BOSS	0.0118037	0.0332167	127.686	566.841	GJA1
diphenhydramine BOSS	0.0118037	0.0332167	127.686	566.841	GJA1
tanespimycin PC3 UP	0.0119525	0.0332167	126.063	558.058	GJA1
2'-Deoxy cyclic AMP BOSS	0.0121013	0.0332167	124.481	549.515	GJA1
Vorinostat BOSS	0.0123989	0.0335924	121.433	533.108	GJA1
172889-27-9 BOSS	0.0125477	0.0336047	119.964	525.228	GJA1
Adenosine triphosphate CTD 00005324	0.0126964	0.0336166	118.53	517.553	GJA1
etretinate BOSS	0.0132912	0.034038	113.119	488.749	GJA1
Dichloromercury CTD 00006273	0.0132912	0.034038	113.119	488.749	GJA1
Chlorophenothane CTD 00005755	0.0134399	0.034038	111.843	481.989	GJA1
Heparitin BOSS	0.0134399	0.034038	111.843	481.989	GJA1
pyrvinium MCF7 DOWN	0.0137372	0.0344168	109.374	468.956	GJA1
hydroxyurea CTD 00006132	0.0143316	0.035139	104.747	444.683	SNCA
2-Naphthalenamine CTD 00007026	0.0143316	0.035139	104.747	444.683	SNCA
phenylephrine BOSS	0.0144801	0.035139	103.651	438.96	GJA1
Omega-3 Fatty Acids BOSS	0.0146287	0.035139	102.577	433.366	GJA1
METHAMPHETAMINE CTD 00006286	0.0150742	0.0358272	99.485	417.316	SNCA
losartan BOSS	0.0152227	0.0358272	98.495	412.198	GJA1
Doxorubicin Hydrochloride	0.0155197	0.0361452	96.5728	402.288	SNCA
nitric oxide CTD 00006402	0.0156681	0.0361452	95.6394	397.49	SNCA
cytarabine CTD 00005743	0.00258976	0.0269619	65.5574	390.472	SLC40A1 and SNCA
puromycin MCF7 DOWN	0.0173	0.0395186	86.4435	350.705	GJA1
8-Bromo-cAMP, Na CTD 00007044	0.00311451	0.0269619	59.5292	343.584	GJA1 and SNCA
Ethylene dimethacrylate BOSS	0.0175965	0.0398057	84.9573	343.232	GJA1
isoproterenol BOSS	0.0198185	0.0424078	75.2462	295.051	GJA1
Adenosine triphosphate BOSS	0.0199665	0.0424078	74.6767	292.262	GJA1
ACROLEIN CTD 00005313	0.0207063	0.0424078	71.9529	278.984	SNCA
Deacetylchitin BOSS	0.0212979	0.0424078	69.912	269.101	GJA1
CADMIUM BOSS	0.0212979	0.0424078	69.912	269.101	SLC40A1
atorvastatin BOSS	0.0212979	0.0424078	69.912	269.101	GJA1
tamoxifen CTD 00006827	0.00468969	0.0269619	47.9925	257.354	GJA1 and SNCA
Cyperquat CTD 00007079	0.0236619	0.0424078	62.7816	235.048	SNCA
oleic acid BOSS	0.0236619	0.0424078	62.7816	235.048	GJA1
forskolin BOSS	0.02499	0.0424078	59.3713	219.037	GJA1
staurosporine CTD 00007273	0.0252849	0.0424078	58.6627	215.735	SNCA
dirithromycin HL60 UP	0.0254324	0.0424078	58.3147	214.116	SNCA
L-aspartic acid BOSS	0.0257273	0.0424078	57.6308	210.94	GJA1
dimethyl sulfoxide BOSS	0.0263169	0.0424078	56.3097	204.829	GJA1
GEMCITABINE HYDROCHLORIDE BOSS	0.0266116	0.0424078	55.6713	201.887	GJA1
dUTP BOSS	0.0266116	0.0424078	55.6713	201.887	GJA1
histamine BOSS	0.0267589	0.0424078	55.3575	200.444	GJA1
clopamide HL60 UP	0.0267589	0.0424078	55.3575	200.444	SNCA
hydrogen sulfide BOSS	0.0269062	0.0424078	55.0472	199.018	GJA1
L-threonine BOSS	0.0269062	0.0424078	55.0472	199.018	GJA1
hemin BOSS	0.0269062	0.0424078	55.0472	199.018	SLC40A1
PROPIDIUM BOSS	0.0270535	0.0424078	54.7403	197.609	GJA1
glycerol BOSS	0.0272008	0.0424078	54.4368	196.218	GJA1
Melatonin BOSS	0.027348	0.0424078	54.1366	194.844	GJA1
Copper(II) chloride CTD 00001408	0.027348	0.0424078	54.1366	194.844	SNCA
sucrose BOSS	0.0274953	0.0424078	53.8397	193.486	GJA1
methanol BOSS	0.0276425	0.0424078	53.5459	192.144	GJA1
L-cysteine BOSS	0.0276425	0.0424078	53.5459	192.144	GJA1
formic acid BOSS	0.0276425	0.0424078	53.5459	192.144	GJA1
lactic acid BOSS	0.0276425	0.0424078	53.5459	192.144	GJA1
liothyronine BOSS	0.0277897	0.0424078	53.2554	190.819	GJA1
sodium chloride BOSS	0.0277897	0.0424078	53.2554	190.819	GJA1
Superoxide BOSS	0.0280841	0.0424078	52.6835	188.214	GJA1
D-Norepinephrine d-bitartrate BOSS	0.0282313	0.0424078	52.4021	186.935	GJA1
L-glutamic acid BOSS	0.0282313	0.0424078	52.4021	186.935	GJA1
serine BOSS	0.0283785	0.0424078	52.1237	185.671	GJA1
streptozocin BOSS	0.0283785	0.0424078	52.1237	185.671	GJA1
nitric oxide BOSS	0.0283785	0.0424078	52.1237	185.671	GJA1
N-Acetyl-L-cysteine BOSS	0.0283785	0.0424078	52.1237	185.671	GJA1
Phetharbital BOSS	0.0285256	0.0424078	51.8482	184.421	GJA1
GONADORELIN BOSS	0.0285256	0.0424078	51.8482	184.421	GJA1
diazepam BOSS	0.0286728	0.0424078	51.5755	183.186	GJA1
Angiotensin II, human BOSS	0.0286728	0.0424078	51.5755	183.186	GJA1
ethisterone BOSS	0.0286728	0.0424078	51.5755	183.186	GJA1
cerivastatin BOSS	0.0286728	0.0424078	51.5755	183.186	GJA1
Simvastatin and niacin BOSS	0.0286728	0.0424078	51.5755	183.186	GJA1
17-Hydroxy-17-methylandrost-4-en-3-one BOSS	0.0288199	0.0424078	51.3057	181.965	GJA1
MANGANESE CHLORIDE CTD 00001187	0.0291141	0.0424078	50.7744	179.565	SNCA
Dinoprostone BOSS	0.0291141	0.0424078	50.7744	179.565	GJA1
water BOSS	0.0291141	0.0424078	50.7744	179.565	GJA1
11-cis-Retinal BOSS	0.0292612	0.0424078	50.5128	178.386	GJA1
fulvestrant MCF7 DOWN	0.0292612	0.0424078	50.5128	178.386	GJA1
LAMININ BOSS	0.0292612	0.0424078	50.5128	178.386	GJA1
tamoxifen BOSS	0.0292612	0.0424078	50.5128	178.386	GJA1
Acid red 87 BOSS	0.0294082	0.0424078	50.2538	177.219	GJA1
alprazolam BOSS	0.0295553	0.0424078	49.9975	176.066	GJA1
L-thyroxine BOSS	0.0298493	0.0424078	49.4925	173.798	GJA1
cephaeline MCF7 DOWN	0.0298493	0.0424078	49.4925	173.798	GJA1
MG-132 MCF7 DOWN	0.0307311	0.0433408	48.0364	167.286	GJA1
2,2',4,4',5,5'-Hexachlorobiphenyl CTD 00000731	0.030878	0.0433408	47.8019	166.241	GJA1
Cube root extract CTD 00006707	0.0313186	0.043696	47.1119	163.174	SNCA
PARAQUAT CTD 00006471	0.0316123	0.0438433	46.6627	161.183	SNCA
oxyphenbutazone BOSS	0.0321995	0.0443934	45.7894	157.323	GJA1
progesterone BOSS	0.0327865	0.0449368	44.9477	153.62	GJA1
SARIN CTD 00006722	0.0339597	0.0462725	43.3531	146.645	SNCA
LITHIUM CHLORIDE CTD 00007226	0.0342528	0.0463298	42.9717	144.986	SNCA
Retinoic acid BOSS	0.0343994	0.0463298	42.7835	144.168	GJA1
1-NITROPYRENE CTD 00001569	0.0346924	0.0463856	42.412	142.557	SNCA
verteporfin MCF7 DOWN	0.034839	0.0463856	42.2286	141.762	GJA1
emetine MCF7 DOWN	0.0361569	0.0478668	40.6461	134.94	GJA1
Bisphenol A CTD 00000312	0.0114345	0.0332167	29.7413	132.977	GJA1 and SLC40A1
topotecan CTD 00007293	0.0370348	0.0486696	39.6546	130.698	GJA1
HEMATOXYLIN BOSS	0.0371811	0.0486696	39.494	130.012	GJA1
arsenite CTD 00000779	0.0121177	0.0332167	28.812	127.15	GJA1 and SNCA
rifabutin MCF7 UP	0.0395195	0.0514415	37.0883	119.831	GJA1
azacyclonol HL60 UP	0.0406872	0.0526673	35.9909	115.237	SNCA
chlortetracycline HL60 UP	0.0427285	0.0548884	34.217	107.882	SNCA
Allococaine CTD 00005697	0.0428742	0.0548884	34.0969	107.388	SNCA
chlorhexidine PC3 UP	0.0433112	0.0550296	33.7414	105.926	SNCA
ajmaline HL60 UP	0.0434568	0.0550296	33.6246	105.446	SNCA
OCHRATOXIN A CTD 00001202	0.0438936	0.0552823	33.2787	104.029	GJA1
anisomycin MCF7 DOWN	0.0453488	0.0568079	32.1748	99.5288	GJA1
N-Acetyl-L-cysteine CTD 00005305	0.0465118	0.0579532	31.3424	96.1599	SNCA
resveratrol CTD 00002483	0.0181887	0.0407496	23.0119	92.2076	GJA1 and SNCA
clindamycin HL60 UP	0.0489801	0.0603828	29.7069	89.6063	SNCA
mifepristone CTD 00007083	0.0492702	0.0604208	29.5255	88.8847	GJA1
lobeline HL60 UP	0.0501401	0.0611657	28.9941	86.7774	SNCA
COPPER CTD 00005706	0.0201579	0.0424078	21.7212	84.8032	SLC40A1 and SNCA
5-azacytidine CTD 00005455	0.0518785	0.0629567	27.9858	82.8057	GJA1
glibenclamide HL60 UP	0.0539039	0.0650756	26.8932	78.5429	SNCA
Decitabine CTD 00000750	0.0228318	0.0424078	20.2436	76.5128	GJA1 and SNCA
3'-Azido-3'-deoxythymidine CTD 00007047	0.0550599	0.0661287	26.3056	76.2688	SLC40A1
ampyrone HL60 UP	0.0559264	0.0668248	25.8813	74.6343	SNCA
Medroxyprogesterone acetate CTD 00006623	0.057225	0.0680277	25.2693	72.2896	GJA1
danazol HL60 UP	0.0585225	0.0692169	24.6851	70.0649	SNCA
progesterone CTD 00006624	0.0257378	0.0424078	18.9064	69.1936	GJA1 and SLC40A1
Methaneseleninic acid CTD 00000412	0.0590987	0.0695455	24.4339	69.1124	GJA1
MG-262 MCF7 DOWN	0.0598187	0.070039	24.1268	67.9517	GJA1
Pentabromodiphenyl ether CTD 00003077	0.06097	0.07103	23.651	66.1606	SLC40A1
cimetidine PC3 UP	0.0619765	0.0718435	23.2494	64.6566	SNCA
MS-275 PC3 UP	0.0632696	0.0729793	22.7523	62.8044	GJA1
chlorzoxazone HL60 UP	0.0667121	0.0756793	21.5231	58.2711	SNCA
Phorbol 12-myristate 13-acetate CTD 00006852	0.0707176	0.0796	20.2438	53.627	GJA1
3-(1-methylpyrrolidin-2-yl)pyridine CTD 00006393	0.0730013	0.0817755	19.5773	51.2393	SNCA
Dasatinib CTD 00004330	0.0734291	0.0818611	19.4571	50.8109	SLC40A1
oxygen CTD 00006454	0.0765621	0.0849475	18.6176	47.8407	GJA1
testosterone enanthate CTD 00000155	0.0778418	0.085958	18.2942	46.7064	SNCA
Irinotecan hydrochloride CTD 00002224	0.0823821	0.0905426	17.2278	43.0074	GJA1
hydrogen peroxide CTD 00006118	0.0487994	0.0603828	12.9734	39.1802	GJA1 and SNCA
proscillaridin HL60 DOWN	0.0901509	0.0981549	15.6527	37.6646	GJA1
AFLATOXIN B1 CTD 00007128	0.0638688	0.0733075	10.9893	30.2307	GJA1 and SLC40A1
7646-79-9 CTD 00000928	0.0643779	0.0735296	10.9347	29.9936	GJA1 and SNCA
quercetin CTD 00006679	0.0669096	0.0756793	10.6724	28.8625	SLC40A1 and SNCA
LEAD CTD 00006203	0.114024	0.122999	12.1563	26.3956	SNCA
Caspan CTD 00000180	0.116375	0.124955	11.8897	25.5741	SLC40A1
lycorine HL60 UP	0.123813	0.131728	11.1127	23.2142	GJA1
Cianidanol CTD 00005600	0.124911	0.132292	11.0058	22.8936	SLC40A1
trichostatin A CTD 00000660	0.0848143	0.0927781	9.16527	22.6134	SLC40A1 and SNCA
Bortezomib CTD 00003736	0.126009	0.132851	10.9008	22.58	SNCA
Tetradioxin CTD 00006848	0.0930947	0.100889	8.61976	20.4645	GJA1 and SLC40A1
diazinon CTD 00005790	0.146282	0.15353	9.24513	17.7712	SLC40A1
estradiol CTD 00005920	0.120612	0.128911	7.22796	15.2884	GJA1 and SLC40A1
5-Fluorouracil CTD 00005987	0.169689	0.177298	7.82515	13.8802	GJA1
Arsenenous acid CTD 00000922	0.180376	0.187624	7.29914	12.5013	GJA1
metronidazole PC3 UP	0.184704	0.191271	7.10342	11.9977	SNCA
TERT-BUTYL HYDROPEROXIDE CTD 00007349	0.187973	0.193795	6.96157	11.636	GJA1
2-Methylcholine CTD 00002006	0.229671	0.235742	5.50511	8.09859	SNCA
POTASSIUM CHROMATE CTD 00001284	0.258425	0.264092	4.77347	6.45922	SLC40A1
(-)-Epigallocatechin gallate CTD 00002033	0.284776	0.28975	4.2319	5.31549	SLC40A1
VALPROIC ACID CTD 00006977	0.374596	0.379482	2.81276	2.76187	SLC40A1 and SNCA
acetaminophen CTD 00005295	0.50087	0.505206	1.9186	1.32654	SLC40A1
cyclosporin A CTD 00007121	0.563207	0.565634	1.57266	0.902876	SLC40A1
Copper sulfate CTD 00007279	0.658196	0.658196	1.16226	0.486118	SLC40A1
